# Supplementary material for: Antibiotics for uncomplicated skin abscesses: systematic review and network meta-analysis
Source: PubMed Central journal article supplement — BMJ Open. 2018 Feb 6;8(2):e020991. doi: 10.1136/bmjopen-2017-020991 (PMC5829937; doi:10.1136/bmjopen-2017-020991), 2018-02-06
Supplement: bmjopen-2017-020991supp003.pdf [file bmjopen-2017-020991supp003.pdf]

**Appendix 3 Sensitivity analyses for the comparison between antibiotics versus placebo/standard care**

**Table A Sensitivity analyses using alternative effect measures**

| Outcomes                                | No. of trials | Events/total |                        | RR(95%CI)       | P value | I <sup>2</sup> | Tau <sup>2</sup> |
|-----------------------------------------|---------------|--------------|------------------------|-----------------|---------|----------------|------------------|
|                                         |               | Antibiotics  | Placebo/ standard care | M-H, Random     |         |                |                  |
| <b>Treatment failure within 1 month</b> |               |              |                        |                 |         |                |                  |
| Antibiotics vs Placebo                  | 8             | 110/1396     | 165/1121               | 0.62(0.42,0.91) | 0.02    | 48%            | 0.12             |
| <b>Recurrence within 1 month</b>        |               |              |                        |                 |         |                |                  |
| Antibiotics vs Placebo                  | 6             | 93/1213      | 134/921                | 0.53(0.35,0.80) | 0.003   | 45%            | 0.11             |
| <b>Late recurrence 1 to 3 months</b>    |               |              |                        |                 |         |                |                  |
| Antibiotics vs Placebo                  | 2             | 96/550       | 140/561                | 0.72(0.54,0.97) | 0.03    | 18%            | 0.01             |
| <b>Hospitalization</b>                  |               |              |                        |                 |         |                |                  |
| Antibiotics vs Placebo                  | 2             | 19/597       | 35/609                 | 0.56(0.33,0.96) | 0.04    | 0%             | 0.00             |
| <b>Gastrointestinal side effects</b>    |               |              |                        |                 |         |                |                  |
| TMP-SMX vs Placebo                      | 4             | 303/1064     | 252/1072               | 1.18(1.03,1.34) | 0.02    | 0%             | 0.00             |
| Clindamycin vs Placebo                  | 1             | 49/265       | 23/255                 | 2.05(1.29,3.26) | 0.002   | -              | -                |
| <b>Nausea</b>                           |               |              |                        |                 |         |                |                  |

|                        |   |         |         |                  |       |     |      |
|------------------------|---|---------|---------|------------------|-------|-----|------|
| TMP-SMX vs Placebo     | 3 | 149/987 | 108/988 | 1.44(0.91,2.28)  | 0.12  | 19% | 0.06 |
| Clindamycin vs Placebo | 1 | 6/265   | 6/255   | 0.96(0.31,2.94)  | 0.95  | -   | -    |
| <b>Diarrhoea</b>       |   |         |         |                  |       |     |      |
| TMP-SMX vs Placebo     | 3 | 111/964 | 117/948 | 0.93(0.73,1.19)  | 0.57  | 0%  | 0.00 |
| Clindamycin vs Placebo | 1 | 43/265  | 17/255  | 2.43(1.43,4.15)  | 0.001 | -   | -    |
| <b>Anaphylaxis</b>     |   |         |         |                  |       |     |      |
| TMP-SMX vs Placebo     | 3 | 7/434   | 3/455   | 1.78(0.49,6.42)  | 0.38  | 0%  | 0.00 |
| Clindamycin vs Placebo | 1 | 7/265   | 3/255   | 2.25(0.59,8.59)  | 0.24  | -   | -    |
| <b>Death</b>           |   |         |         |                  |       |     |      |
| TMP-SMX vs Placebo     | 2 | 1/891   | 1/872   | 0.98(0.06,15.62) | 0.99  | -   | -    |
| Clindamycin vs Placebo | 1 | 0/265   | 0/255   | -                | -     | -   | -    |
| <b>Sepsis</b>          |   |         |         |                  |       |     |      |
| TMP-SMX vs Placebo     | 1 | 1/630   | 0/617   | 2.94(0.12,71.99) | 0.51  | -   | -    |

**Table B Sensitivity analyses using alternative statistical model**

| Outcomes                             | No. of trials | Events/total |                        | OR(95%CI)<br>M-H, Fixed | P value | I <sup>2</sup> |
|--------------------------------------|---------------|--------------|------------------------|-------------------------|---------|----------------|
|                                      |               | Antibiotics  | Placebo/ standard care |                         |         |                |
| <b>Late recurrence</b>               |               |              |                        |                         |         |                |
| Antibiotics vs Placebo               | 2             | 96/550       | 140/561                | 0.64(0.48,0.85)         | 0.003   | 0%             |
| <b>Hospitalization</b>               |               |              |                        |                         |         |                |
| Antibiotics vs Placebo               | 2             | 19/597       | 35/609                 | 0.54(0.31,0.96)         | 0.03    | 0%             |
| <b>Gastrointestinal side effects</b> |               |              |                        |                         |         |                |
| TMP-SMX vs Placebo                   | 4             | 303/1064     | 252/1072               | 1.30(1.05,1.60)         | 0.01    | 0%             |
| Clindamycin vs Placebo               | 1             | 49/265       | 23/255                 | 2.29(1.35,3.88)         | 0.002   | -              |
| <b>Nausea</b>                        |               |              |                        |                         |         |                |
| TMP-SMX vs Placebo                   | 3             | 149/987      | 108/988                | 1.44(1.10,1.90)         | 0.008   | 11%            |
| Clindamycin vs Placebo               | 1             | 6/265        | 6/255                  | 0.96(0.31,3.32)         | 0.95    | -              |
| <b>Diarrhoea</b>                     |               |              |                        |                         |         |                |
| TMP-SMX vs Placebo                   | 3             | 111/964      | 117/948                | 0.92(0.70,1.22)         | 0.56    | 0%             |
| Clindamycin vs Placebo               | 1             | 43/265       | 17/255                 | 2.71(1.50,4.89)         | 0.0009  | -              |

|                        |   |        |       |                 |      |    |
|------------------------|---|--------|-------|-----------------|------|----|
| <b>Anaphylaxis</b>     | 3 | 14/699 | 3/455 | 2.41(0.80,7.22) | 0.12 | 0% |
| TMP-SMX vs Placebo     | 3 | 7/434  | 3/455 | 2.10(0.63,6.96) | 0.23 | 0% |
| Clindamycin vs Placebo | 1 | 7/265  | 3/255 | 2.28(0.58,8.91) | 0.24 | -  |

**Table C Sensitivity analyses using alternative pooling method**

| Outcomes                             | No. of trials | Events/total |                           | OR(95%CI)<br>M-H, Random | P value | I <sup>2</sup> | Tau <sup>2</sup> |
|--------------------------------------|---------------|--------------|---------------------------|--------------------------|---------|----------------|------------------|
|                                      |               | Antibiotics  | Placebo/<br>standard care |                          |         |                |                  |
| <i>Hospitalization</i>               |               |              |                           |                          |         |                |                  |
| Antibiotics vs Placebo               | 2             | 19/597       | 35/609                    | 0.54(0.31,0.96)          | 0.04    | 0%             | 0.00             |
| <i>Infections in family members</i>  |               |              |                           |                          |         |                |                  |
| TMP-SMX vs Placebo                   | 1             | 20/504       | 34/509                    | 0.58(0.33,1.02)          | 0.06    | -              | -                |
| <i>Invasive infections (1 month)</i> |               |              |                           |                          |         |                |                  |
| TMP-SMX vs Placebo                   | 1             | 2/524        | 2/533                     | 1.02(0.14,7.25)          | 0.99    | -              | -                |
| <i>Invasive infections (3 month)</i> |               |              |                           |                          |         |                |                  |
| TMP-SMX vs Placebo                   | 1             | 1/504        | 0/509                     | 3.04(0.12,74.70)         | 0.50    | -              | -                |
| <i>Anaphylactic reaction</i>         |               |              |                           |                          |         |                |                  |
| TMP-SMX vs Placebo                   | 3             | 7/434        | 3/455                     | 1.80(0.49,6.58)          | 0.38    | 0%             | 0.00             |
| Clindamycin vs Placebo               | 1             | 7/265        | 3/255                     | 2.28(0.58, 8.91)         | 0.24    | -              | -                |
| <i>Sepsis</i>                        |               |              |                           |                          |         |                |                  |
| TMP-SMX vs Placebo                   | 1             | 1/630        | 0/617                     | 2.94(0.12,72.38)         | 0.51    | -              | -                |

---

*Death*

---

|                    |   |       |       |                  |      |   |   |
|--------------------|---|-------|-------|------------------|------|---|---|
| TMP-SMX vs Placebo | 2 | 1/891 | 1/872 | 0.98(0.06,15.69) | 0.99 | - | - |
|--------------------|---|-------|-------|------------------|------|---|---|

---

**Table D Sensitivity analyses using different inclusion criteria and different definition of treatment failure**

| Outcomes                                                                               | No. of trials | Events/total |                        | OR(95%CI)<br>M-H, Random | P value | I <sup>2</sup> | Tau <sup>2</sup> |
|----------------------------------------------------------------------------------------|---------------|--------------|------------------------|--------------------------|---------|----------------|------------------|
|                                                                                        |               | Antibiotics  | Placebo/ standard care |                          |         |                |                  |
| <b>Sensitivity analyses by omitting trials exclusively reporting recurrence</b>        |               |              |                        |                          |         |                |                  |
| Treatment failure within 1 month                                                       | 6             | 101/1262     | 157/1036               | 0.56 (0.35,0.90)         | 0.02    | 53%            | 0.16             |
| <b>Sensitivity analyses by omitting trials with patients treated by primary suture</b> |               |              |                        |                          |         |                |                  |
| Treatment failure within 1 month                                                       | 7             | 101/1319     | 160/1077               | 0.54 (0.34,0.86)         | 0.010   | 49%            | 0.16             |
| Recurrence within 1 month                                                              | 5             | 84/1136      | 129/877                | 0.43 (0.27,0.71)         | 0.0008  | 45%            | 0.13             |
| <b>Sensitivity analyses by omitting trials published before 1990</b>                   |               |              |                        |                          |         |                |                  |
| Treatment failure within 1 month                                                       | 5             | 100/1235     | 156/1013               | 0.56 (0.34,0.93)         | 0.03    | 62%            | 0.19             |
| Recurrence within 1 month                                                              | 4             | 84/1079      | 126/836                | 0.45 (0.27,0.74)         | 0.002   | 51%            | 0.13             |

**Table E Sensitivity analyses using alternative methods of random effects meta-analysis**

| Outcomes                                | No. of trials | Events/total |                        | OR (95%CI)       | P value |
|-----------------------------------------|---------------|--------------|------------------------|------------------|---------|
|                                         |               | Antibiotics  | Placebo/ standard care | HKSJ             |         |
| <i>Treatment failure within 1 month</i> |               |              |                        |                  |         |
| Antibiotics vs Placebo                  | 8             | 110/1396     | 165/1121               | 0.58 (0.33,1.01) | 0.05    |
| <i>Recurrence within 1 month</i>        |               |              |                        |                  |         |
| Antibiotics vs Placebo                  | 6             | 93/1213      | 134/921                | 0.48 (0.26,0.88) | 0.03    |
| <i>Late recurrence 1 to 3 month</i>     |               |              |                        |                  |         |
| Antibiotics vs Placebo                  | 2             | 96/550       | 140/561                | 0.64 (0.10,4.08) | 0.20    |
| <i>Hospitalization</i>                  |               |              |                        |                  |         |
| Antibiotics vs Placebo                  | 2             | 19/597       | 35/609                 | 0.54 (0.19,1.56) | 0.09    |
| <i>Gastrointestinal side effects</i>    |               |              |                        |                  |         |
| TMP-SMX vs Placebo                      | 4             | 303/1064     | 252/1072               | 1.28 (0.92,1.78) | 0.10    |
| <i>Nausea</i>                           |               |              |                        |                  |         |
| TMP-SMX vs Placebo                      | 3             | 149/987      | 108/988                | 1.49 (0.58,3.82) | 0.21    |
| <i>Diarrhoea</i>                        |               |              |                        |                  |         |
| TMP-SMX vs Placebo                      | 3             | 111/964      | 117/948                | 0.92 (0.74,1.15) | 0.25    |



---

*Anaphylaxis*

---

|                    |   |       |       |                  |      |
|--------------------|---|-------|-------|------------------|------|
| TMP-SMX vs Placebo | 3 | 7/434 | 3/455 | 1.80(0.13,24.56) | 0.44 |
|--------------------|---|-------|-------|------------------|------|

---

HKSJ=Hartung-Knapp-Sidik-Jonkman

**Table F Sensitivity analyses using different assumptions about missing data**

| Assumptions                                    | No. of trials | Events/total |                        | OR(95%CI)        | P value  | I <sup>2</sup> | Tau <sup>2</sup> |
|------------------------------------------------|---------------|--------------|------------------------|------------------|----------|----------------|------------------|
|                                                |               | Antibiotics  | Placebo/ standard care |                  |          |                |                  |
| <b><i>Treatment failure within 1 month</i></b> |               |              |                        |                  |          |                |                  |
| None has event*                                | 8             | 110/1597     | 165/1293               | 0.59 (0.38,0.91) | 0.02     | 46%            | 0.15             |
| All had event <sup>†</sup>                     | 8             | 311/1597     | 337/1293               | 0.71 (0.51,0.97) | 0.03     | 46%            | 0.08             |
| Best case scenario <sup>††</sup>               | 8             | 110/1597     | 337/1293               | 0.28 (0.15,0.53) | <0.0001  | 78%            | 0.52             |
| Worst case scenario <sup>‡</sup>               | 8             | 311/1597     | 165/1293               | 1.59 (0.97,2.60) | 0.07     | 68%            | 0.26             |
| Worst plausible analysis <sup>#</sup>          | 8             | 183/1597     | 191/1293               | 0.82 (0.56,1.19) | 0.30     | 44%            | 0.29             |
| <b><i>Recurrence within 1 month</i></b>        |               |              |                        |                  |          |                |                  |
| None has event*                                | 6             | 93/1472      | 134/1171               | 0.52 (0.30,0.89) | 0.02     | 57%            | 0.22             |
| All had event <sup>†</sup>                     | 6             | 352/1472     | 384/1171               | 0.62 (0.48,0.79) | 0.0002   | 27%            | 0.02             |
| Best case scenario <sup>††</sup>               | 6             | 93/1472      | 384/1171               | 0.15 (0.07,0.31) | <0.00001 | 82%            | 0.58             |
| Worst case scenario <sup>‡</sup>               | 6             | 352/1472     | 134/1171               | 2.02 (0.96,4.24) | 0.06     | 86%            | 0.62             |
| Worst plausible analysis                       | 6             | 193/1472     | 177/1171               | 0.83 (0.53,1.29) | 0.4      | 61%            | 0.16             |
| <b><i>Later recurrence 1 to 3 month</i></b>    |               |              |                        |                  |          |                |                  |
| Worst plausible analysis <sup>#</sup>          | 2             | 187/713      | 178/713                | 1.48 (0.55,3.96) | 0.44     | 87%            | 0.45             |

| <i>Hospitalizations</i> §               |   |         |         |                  |      |    |      |
|-----------------------------------------|---|---------|---------|------------------|------|----|------|
| Worst plausible analysis #              | 2 | 39/713  | 41/713  | 0.94 (0.60,1.47) | 0.78 | 0% | 0.00 |
| <i>Pain (tenderness) (3 to 4 days)</i>  |   |         |         |                  |      |    |      |
| Worst plausible analysis #              | 1 | 337/636 | 352/629 | 0.89 (0.71,1.11) | 0.29 | -  | -    |
| <i>Pain (tenderness) (8 to 10 days)</i> |   |         |         |                  |      |    |      |
| Worst plausible analysis #              | 1 | 63/636  | 64/629  | 0.97 (0.67,1.40) | 0.87 | -  | -    |
| <i>Additional surgical procedures</i>   |   |         |         |                  |      |    |      |
| Worst plausible analysis #              | 1 | 97/636  | 85/629  | 1.15 (0.84,1.58) | 0.38 | -  | -    |

\* All the participants lost to follow up did not have the event;

† All the participants lost to follow up had the event;

†† None of those lost to follow-up in the treatment group had the event and all those lost to follow-up in the control group did;

‡ All participants lost to follow-up in the treatment group had the event and none of those in the control group did;

# Worst plausible analysis: Meta-analysis using the plausible most stringent  $RI_{MPD/FU}$  (the incidence of outcome events in participants with missing data relative to those with complete follow-up). We defined a constant  $RI_{MPD/FU}$  of 1.0 for control group missing participants, and 1.5, 2, 3, 5 for antibiotics group when the event rate was >40%, 30-40%, 10-30%, <10% respectively.

§ Pooled data using Peto's methods
