# Supplementary material for: Antibiotics for uncomplicated skin abscesses: systematic review and network meta-analysis
Source: PubMed Central journal article supplement — BMJ Open. 2018 Feb 6;8(2):e020991. doi: 10.1136/bmjopen-2017-020991 (PMC5829937; doi:10.1136/bmjopen-2017-020991), 2018-02-06
Supplement: bmjopen-2017-020991supp004.pdf [file bmjopen-2017-020991supp004.pdf]

## Appendix 4

Table A GRADE judgements for NMA of antibiotics for skin abscesses\*

| Treatment 1 | Treatment 2 | Direct evidence |               |              |                  |                                   |                                                  |                                | Indirect evidence    |                                        |                   |                                        |                                                    |                                     |             | Network estimate                 |                                                          |             |                      |    |    |      |
|-------------|-------------|-----------------|---------------|--------------|------------------|-----------------------------------|--------------------------------------------------|--------------------------------|----------------------|----------------------------------------|-------------------|----------------------------------------|----------------------------------------------------|-------------------------------------|-------------|----------------------------------|----------------------------------------------------------|-------------|----------------------|----|----|------|
|             |             | Risk of bias    | Inconsistency | Indirectness | Publication bias | Direct rating without imprecision | Direct is more precise than indirect imprecision | Direct rating with imprecision | Common comparator(s) | Treatment 1 vs first common comparator | Middle comparison | Treatment 2 vs final common comparator | Lowest of common direct comparisons Intransitivity | Indirect rating without imprecision | Imprecision | Indirect rating with imprecision | Higher rating of direct and indirect without incoherence | Imprecision | Network rating final |    |    |      |
| No Abx      | Early C     | No              | No            | No           | No               | High                              | NA                                               | -1                             | Mod                  |                                        |                   |                                        |                                                    |                                     |             |                                  |                                                          |             |                      |    |    |      |
| No Abx      | Late C      |                 |               |              |                  |                                   |                                                  |                                |                      | Early C                                | High              | NA                                     | High                                               | High                                | No          | High                             | -2                                                       | Low         | High                 | NA | -2 | Low  |
| No Abx      | TMP/SMX     | -1              | No            | No           | No               | Mod                               | Yes                                              | No                             | Mod                  | Clinda.                                | High              | NA                                     | High                                               | High                                | No          | High                             | -2                                                       | Low         | High                 | No | No | Mod  |
| No Abx      | Clinda.     | -1              | No            | No           | No               | Mod                               | Yes                                              | -1                             | Mod                  | TMP/SMX                                | High              | NA                                     | High                                               | High                                | No          | High                             | -2                                                       | Low         | High                 | No | No | Mod  |
| Early C     | Late C      | No              | No            | No           | No               | High                              | NA                                               | -1                             | Mod                  |                                        |                   |                                        |                                                    |                                     |             |                                  |                                                          |             | High                 | NA | -1 | Mod  |
| Early C     | TMP/SMX     |                 |               |              |                  |                                   |                                                  |                                |                      | No Abx                                 | High              | NA                                     | High                                               | High                                | No          | High                             | -1                                                       | Mod         | High                 | NA | -1 | Mod  |
| Early C     | Clinda.     |                 |               |              |                  |                                   |                                                  |                                |                      | No Abx                                 | High              | NA                                     | High                                               | High                                | No          | High                             | -1                                                       | Mod         | High                 | NA | -1 | Mod  |
| Late C      | TMP/SMX     |                 |               |              |                  |                                   |                                                  |                                |                      | Early C/No                             |                   |                                        |                                                    |                                     |             |                                  |                                                          |             |                      |    |    |      |
| Late C      | TMP/SMX     |                 |               |              |                  |                                   |                                                  |                                |                      | Abx                                    | High              | High                                   | High                                               | High                                | No          | High                             | -1                                                       | Mod         | High                 | NA | -1 | Mod  |
| Late C      | Clinda.     |                 |               |              |                  |                                   |                                                  |                                |                      | Early C/No                             |                   |                                        |                                                    |                                     |             |                                  |                                                          |             |                      |    |    |      |
| Late C      | Clinda.     |                 |               |              |                  |                                   |                                                  |                                |                      | Abx                                    | High              | High                                   | High                                               | High                                | No          | High                             | -1                                                       | Mod         | High                 | NA | -1 | Mod  |
| TMP/SMX     | Clinda.     | No              | No            | No           | No               | High                              | Yes                                              | -1                             | Mod                  | No Abx                                 | High              | NA                                     | High                                               | Mod                                 | No          | High                             | -2                                                       | Low         | High                 | No | No | High |

No Abx, no antibiotics; Early C, early generation (1<sup>st</sup>/2<sup>nd</sup>) cephalosporins; later generation (3<sup>rd</sup>/4<sup>th</sup>) cephalosporins; TMP/SMX, trimethoprim/sulfamethoxazole; Clinda., clindamycin; Mod, Moderate; -1, rated down once because of serious concerns; -2, rated down twice because of very serious concern

\*GRADE certainty ratings can be high, moderate, low, or very low. All comparisons started at high certainty and then were rated down if there were concerns with the GRADE domains listed. 'No' means that we judged there to not be any serious concerns with that domain for that comparison. '-1' means that we rated down the certainty by one category because of serious concerns and '-2' means that we rated down the certainty by two categories because of very serious concerns. For a detailed explanation of the GRADE domains and process for rating comparisons within a network meta-analysis, please see Puhan MA, et al. *BMJ*. 2014;349:g5630.
